# Supplementary material for: Glycyrrhizin suppresses epithelial-mesenchymal transition by inhibiting high-mobility group box1 via the TGF-β1/Smad2/3 pathway in lung epithelial cells
Source: PeerJ. 2020 Feb 3;8:e8514. doi: 10.7717/peerj.8514 (PMC7003690; doi:10.7717/peerj.8514)
Supplement: Supplemental Information 2 [file peerj-08-8514-s002.xlsx]

## Sheet: Sheet1
	%Viability of A549 cells treated by different concentrations of glycyrrhizin.(Statistical method: unpaired t-test. n=3)
A549		24h			48h
	control	100	100	100	100	100	100
	50μM	96.9317	95.8192	86.1735	85.257	83.4833	72.6736
	100μM	91.7416	92.82	81.48	77.5709	79.9249	68.2471
	200μM	89.7416	90.0833	74.6067	68.2355	66.1319	60.612
	300μM	76.8618	72.2678	60.3895	54.4067	52.1876	48.4375
	400μM	70.4968	60.4789	50.5212	39.7244	40.2726	30.1983
	%Viability of BEAS-2B cells treated by different concentrations of glycyrrhizin.(Statistical method: unpaired t-test. n=3)
BEAS-2B		24h			48h
	control	100	100	100	100	100	100
	25μM	99.9342	96.6722	90.9154	89.6547	84.7595	81.0158
	50μM	97.9701	93.5911	85.0049	82.5002	83.5304	77.363
	100μM	92.6477	91.1095	75.4833	78.4	80.8456	67.458
	150μM	80.135	85.7467	69.1697	70.6502	71.2921	62.0632
	200μM	75.0972	77.8169	60.3103	52.3553	55.9904	44.2596
