# Supplementary material for: Glycyrrhizin suppresses epithelial-mesenchymal transition by inhibiting high-mobility group box1 via the TGF-β1/Smad2/3 pathway in lung epithelial cells
Source: PeerJ. 2020 Feb 3;8:e8514. doi: 10.7717/peerj.8514 (PMC7003690; doi:10.7717/peerj.8514)
Supplement: Supplemental Information 3 — n = 3. [file peerj-08-8514-s003.xlsx]

## Sheet: Sheet1
A549	Lv-NC			Lv-HMGB1							BEAS-2B	Lv-NC			Lv-HMGB1
	A1	A2	A3	B1	B2	B3						A1	A2	A3	B1	B2	B3
actin	13.18	14.76	12.88	14.33	14.56	14.32					actin	13.45	12.22	12.17	13.58	13.27	12.96
	13.18	15.33	13.04	14.43	14.65	14.78						13.45	12.14	12.24	13.41	13.26	12.91
	13.18	15.68	13.12	14.21	14.52	14.58						13.5	12.2	12.23	13.62	13.33	12.87
HMGB1	15.92	18.5	15.56	15.1	14.81	14.97					HMGB1	14.9	14.96	13.1	13.14	14.62	12.42
	15.98	18.1	15.68	15.06	14.56	14.74						15.24	14.95	13.08	13.25	14.55	12.47
	15.96	18.3	15.82	14.93	14.83	14.79						15.24	14.86	13.12	13.06	14.6	12.46
	13.18	15.2567	13.0133	14.3233	14.5767	14.56						13.4667	12.1867	12.2133	13.5367	13.2867	12.9133
	15.9533	18.3	15.6867	15.03	14.7333	14.8333						15.1267	14.9233	13.1	13.15	14.59	12.45
	2.77333	3.04333	2.67333	0.706667	0.156667	0.273333						1.66	2.73667	0.886667	-0.386667	1.30333	-0.463333
	0	0	0	-2.06667	-2.88667	-2.77						0	0	0	-2.04667	-1.43333	-1.35
2(-△△t)	1	1	1	4.18918	7.3956	6.82108					2(-△△t)	1	1	1	4.1315	2.7007	2.54912
