# Supplementary material for: Glycyrrhizin suppresses epithelial-mesenchymal transition by inhibiting high-mobility group box1 via the TGF-β1/Smad2/3 pathway in lung epithelial cells
Source: PeerJ. 2020 Feb 3;8:e8514. doi: 10.7717/peerj.8514 (PMC7003690; doi:10.7717/peerj.8514)
Supplement: Supplemental Information 4 — n = 3. [file peerj-08-8514-s004.xlsx]

## Sheet: Sheet1
A549	siNC			siRNA-1			siRNA-2				BEAS-2B	siNC			siRNA-1			siRNA-2
	A1	A2	A3	B1	B2	B3	C1	C2	C3			A1	A2	A3	B1	B2	B3	C1	C2	C3
actin(CT)	12.8	14.58	14.02	13.86	15.45	14.46	14.96	13.9	14.42		actin(CT)	13.04	12.46	13.02	14.85	13.34	13.48	12.8	14.1	13.56
	12.78	14.27	14.04	13.63	15.28	14.47	14.97	13.65	14.47			13.08	12.47	13.04	14.87	13.28	13.47	12.97	14.05	13.69
	12.8	14.28	14.02	13.65	15.42	14.42	14.81	13.65	14.48			13.04	12.4	13.1	14.86	13.2	13.42	13.11	14.05	13.28
HMGB1(CT)	14.62	15.91	15.27	18.65	20.21	18.97	18.59	17.83	18.09		HMGB1(CT)	13.72	13.1	14.15	17.35	16.01	15.72	15.55	16.27	16.1
	14.7	15.36	15.56	19.06	20.25	18.97	18.56	17.86	18.14			13.77	13.06	14.16	17.37	16.89	15.52	15.52	16.26	15.97
	14.53	15.81	15.73	18.63	20.27	18.95	18.93	17.82	17.97			13.73	13.12	14.43	17.25	16.87	15.76	16.15	16.26	15.92
	12.7933	14.3767	14.0267	13.7133	15.3833	14.45	14.9133	13.7333	14.4567			13.0533	12.4433	13.0533	14.86	13.2733	13.4567	12.96	14.0667	13.51
	14.6167	15.6933	15.52	18.78	20.2433	18.9633	18.6933	17.8367	18.0667			13.74	13.0933	14.2467	17.3233	16.59	15.6667	15.74	16.2633	15.9967
	1.82333	1.31667	1.49333	5.06667	4.86	4.51333	3.78	4.10333	3.61			0.686667	0.65	1.19333	2.46333	3.31667	2.21	2.78	2.19667	2.48667
	0	0	0	3.24333	3.54333	3.19667	1.95667	2.78667	2.11667			0	0	0	1.77667	2.66667	1.56	2.09333	1.54667	1.29333
2(-△△t)	1	1	1	0.105599	0.085773	0.109071	0.257623	0.14492	0.230579		2(-△△t)	1	1	1	0.291857	0.15749	0.339151	0.234339	0.3423	0.408007
